# Supplementary material for: Infant Antibody Repertoires during the First Two Years of Influenza Vaccination
Source: PubMed Central journal article supplement (PMC9765176; doi:10.1128/mbio.02546-22), 2022-10-31
Supplement: mbio.02546-22-s0001.pdf [file mbio.02546-22-s0001.pdf]

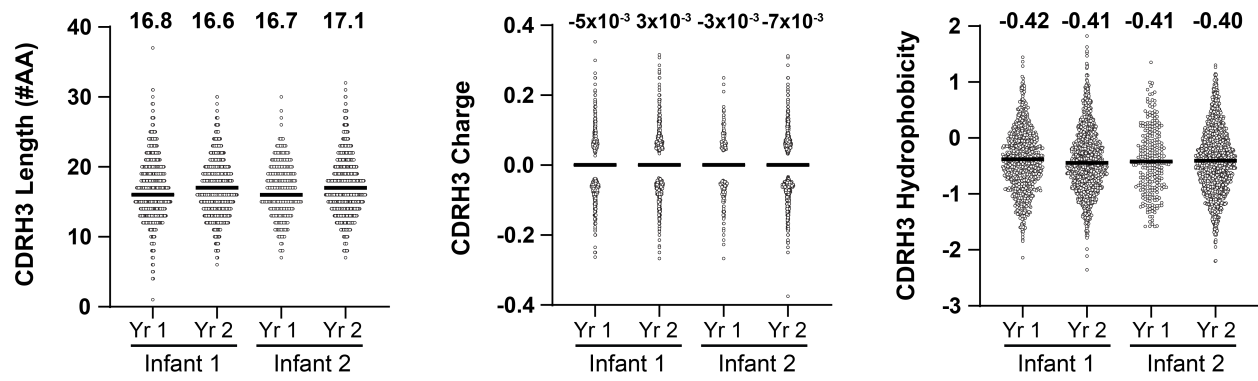

**Fig. S1. CDRH3 length, charge, and hydrophobicity of total post-vaccination B cells.** Median values are represented by horizontal lines and mean values are included above each dataset.
