# Supplementary material for: Infant Antibody Repertoires during the First Two Years of Influenza Vaccination
Source: PubMed Central journal article supplement (PMC9765176; doi:10.1128/mbio.02546-22), 2022-10-31
Supplement: mbio.02546-22-s0002.pdf [file mbio.02546-22-s0002.pdf]

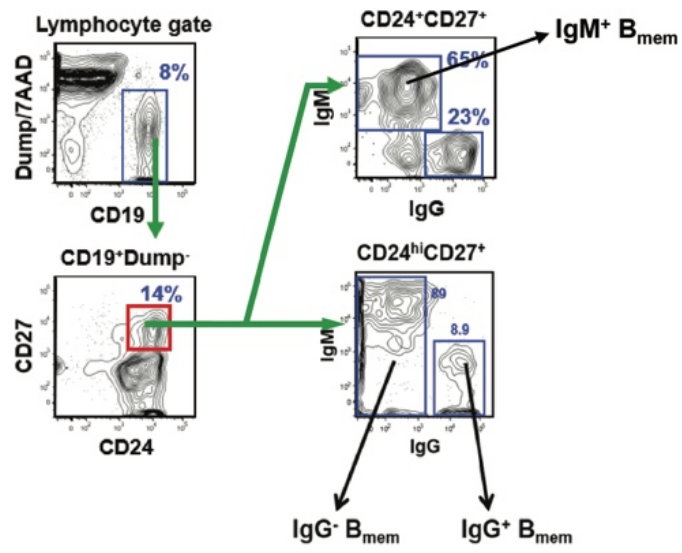

Fig. S2. Representative sorting strategy to isolate B<sub>mem</sub> for Nojima culturing.
