# Supplementary material for: Infant Antibody Repertoires during the First Two Years of Influenza Vaccination
Source: PubMed Central journal article supplement (PMC9765176; doi:10.1128/mbio.02546-22), 2022-10-31
Supplement: mbio.02546-22-s0003.pdf [file mbio.02546-22-s0003.pdf]

**A**

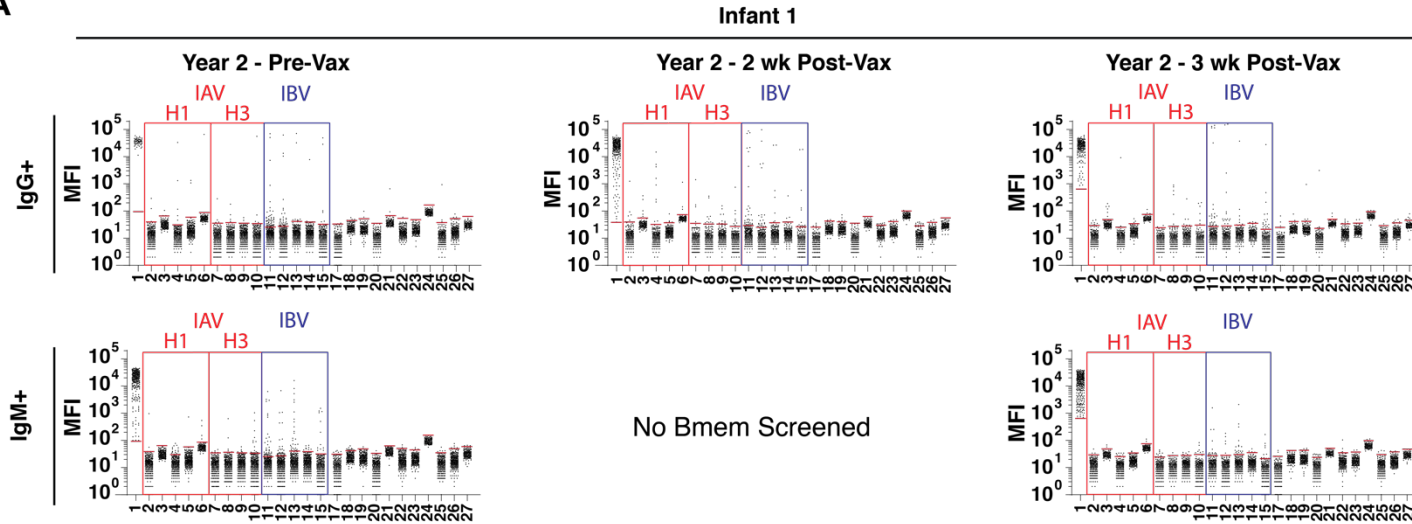

**B**

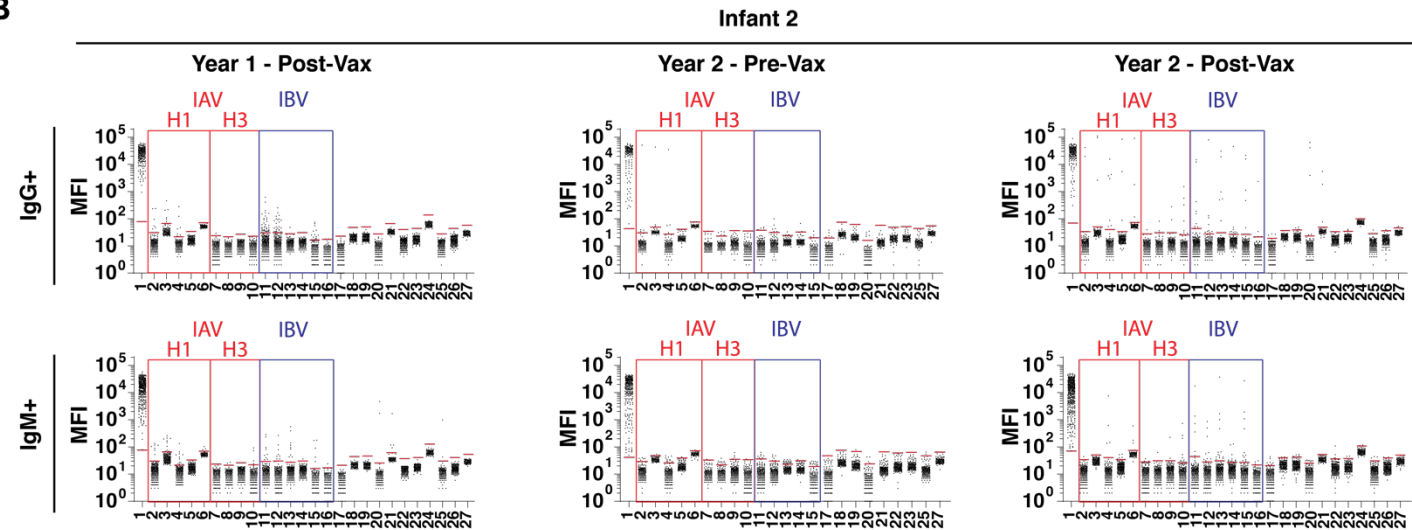

| ID | Antigen        |
|----|----------------|
| 1  | IgG            |
| 2  | CA-09 X-181    |
| 3  | MI-15          |
| 4  | MI-15 X-275    |
| 5  | FL-93          |
| 6  | SI-06          |
| 7  | HK-14 263b     |
| 8  | HK-14 263b-H   |
| 9  | HK-14          |
| 10 | HK-68 X-31     |
| 11 | Phu-13         |
| 12 | Phu-13-H       |
| 13 | FL-17          |
| 14 | FL-17-H        |
| 15 | Bris-08        |
| 16 | Bris-08-H      |
| 17 | BSA            |
| 18 | Streptavidin   |
| 19 | gp140 JR-FL    |
| 20 | Tetanus Toxoid |
| 21 | NP-BSA         |
| 22 | KLH            |
| 23 | OVA            |
| 24 | KYNU           |
| 25 | rPA            |
| 26 | mutKYNU        |
| 27 | Insulin        |

**Fig. S3. Luminex reactivity assays.** Red lines indicate background measurements for each antigen. List on the right shows antigen corresponding to each numbered column. See Materials and Methods (Multiplex Bead Assay) for full name of each HA and control antigen. IgG: mouse anti-human IgG. Antigens marked H are trimeric, head-only constructs.
