# Supplementary material for: Infant Antibody Repertoires during the First Two Years of Influenza Vaccination
Source: PubMed Central journal article supplement (PMC9765176; doi:10.1128/mbio.02546-22), 2022-10-31
Supplement: mbio.02546-22-s0004.pdf [file mbio.02546-22-s0004.pdf]

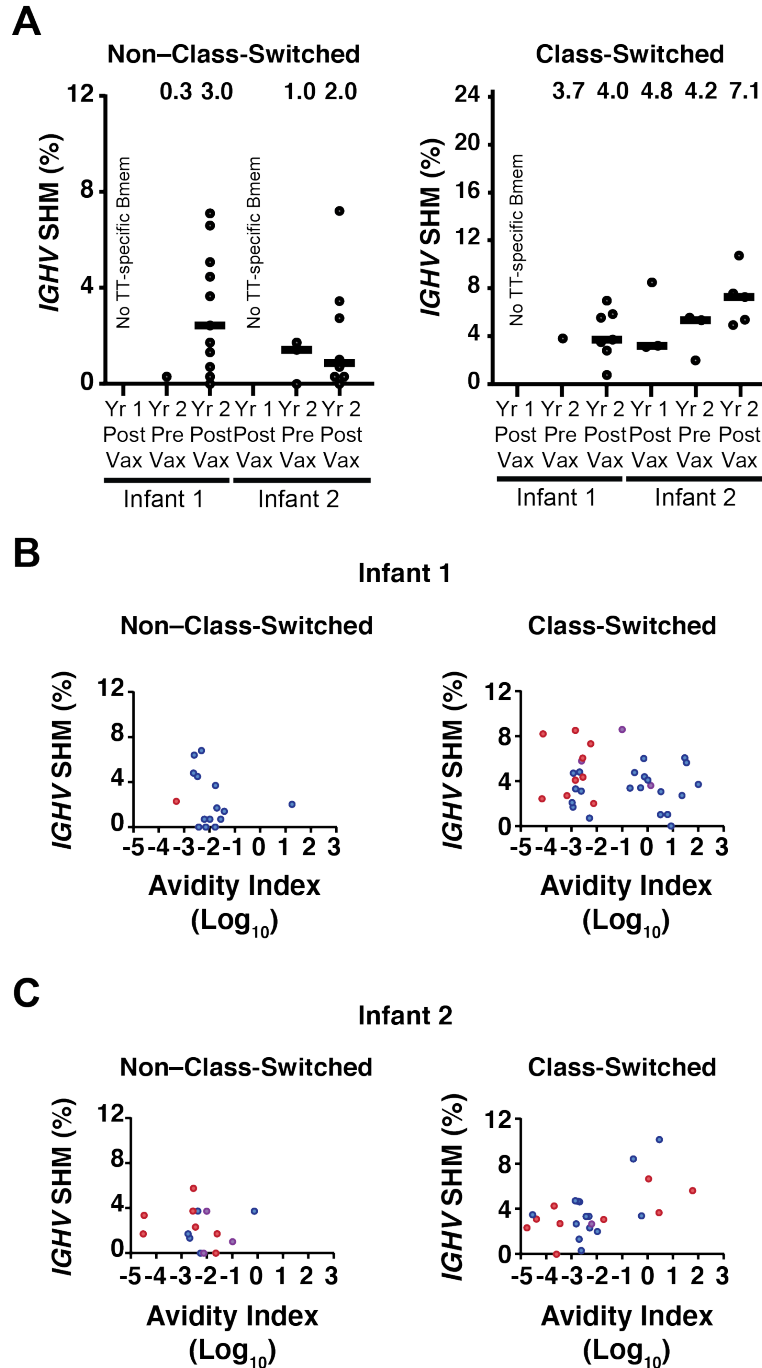

**Fig. S4. SHM for non-class-switched and class-switched Bmem. (A) IGHV SHM of tetanus-toxin (TT) reactive Bmem.** Median values are represented by horizontal lines and mean values are included above each dataset for TT-specific non-class-switched and class-switched Bmem. **(B and C) Avidity index vs. SHM level of HA-specific Bmem.** Correlation plots for Infant 1 (B) and Infant 2 (C) are shown for HA-specific non-class-switched and class-switched Bmem. Red, blue, and purple dots represent IAV-specific, IBV-specific, and IAV+IBV Bmem, respectively. Spearman correlation was non-significant ( $P > 0.05$ ) among all subsets.
