# Supplementary material for: Infant Antibody Repertoires during the First Two Years of Influenza Vaccination
Source: PubMed Central journal article supplement (PMC9765176; doi:10.1128/mbio.02546-22), 2022-10-31
Supplement: mbio.02546-22-s0005.pdf [file mbio.02546-22-s0005.pdf]

**Table S1. IIV immunizations and their components**

**Timing of IIV4 immunizations for infants 1 and 2**

| <b>Infant</b> | <b>Birth Year</b> | <b>Age at Year 1 IIV4</b> | <b>Administered IIV4</b> | <b>Age at Year 2 IIV4</b> | <b>Administered IIV4</b> |
|---------------|-------------------|---------------------------|--------------------------|---------------------------|--------------------------|
| Infant 1      | 2016              | 7 months                  | 2016-2017 IIV4           | 17 months                 | 2017-2018 IIV4           |
| Infant 2      | 2016              | 12 months                 | 2017-2018 IIV4           | 25 months                 | 2018-2019 IIV4           |

**HA components of IIV4 in the seasons relevant to this study**

| <b>IIV4 Components</b> |                          |                           |                             |                             |
|------------------------|--------------------------|---------------------------|-----------------------------|-----------------------------|
| <b>Year</b>            | <b>A/H1 Component</b>    | <b>A/H3 Component</b>     | <b>B/Victoria Component</b> | <b>B/Yamagata Component</b> |
| 2016-2017              | H1/California/2009 X-181 | H3/Hong Kong/2014 X-263B  | B/Brisbane/60/2008          | B/Phuket/3073/2013          |
| 2017-2018              | H1/Michigan/2015 X-275   | H3/Hong Kong/2014 X-263B  | B/Brisbane/60/2008          | B/Phuket/3073/2013          |
| 2018-2019              | H1/Michigan/2015 X-275   | H3/Singapore/2016 IVR-186 | B/Maryland/15/2016          | B/Phuket/3073/2013          |
