# Supplementary material for: Infant Antibody Repertoires during the First Two Years of Influenza Vaccination
Source: PubMed Central journal article supplement (PMC9765176; doi:10.1128/mbio.02546-22), 2022-10-31
Supplement: mbio.02546-22-s0006.pdf [file mbio.02546-22-s0006.pdf]

**Table S2. Recombinant mAbs from Infant 1 Year 1 post-vaccination Bmem.** Clonotypes with high read counts from the NGS data were made as mAbs. For each selected clonotype, the CDRH3 sequence, *IGHV*, *IGHJ*, and SHM levels are shown. mAbs were characterized by ELISA to determine their EC<sub>50</sub> values against HAs. +++: <100 nM; ++: 100-1000 nM; +: detected signal at 1000 nM; -: no signal at 1000nM; H1: A/California/2009 X181; H3: A/Hong Kong/2014 X263B; B/Vic: B/Brisbane/60/2008; B/Yama: B/Phuket/3073/2013.

| Description | CDRH3                        | <i>IGHV</i> | <i>IGHJ</i> | <i>IGHV</i> SHM (%) | H1 Binding | H3 Binding | B/Vic Binding | B/Yama Binding |
|-------------|------------------------------|-------------|-------------|---------------------|------------|------------|---------------|----------------|
| IgG-rank 1  | CAKDFYGSWGSMDVW              | 3-9         | 6           | 0.7                 | -          | -          | -             | -              |
| IgG-rank 2  | CARGNGPGSYLIDYW              | 1-3         | 4           | 6.4                 | +          | -          | -             | -              |
| IgG-rank 3  | CARGGGTMIVPIKPHNWYFDLW       | 1-18        | 2           | 1.7                 | +++        | ++         | -             | -              |
| IgG-rank 4  | CARVRPLTVGWHFDLW             | 4-61        | 2           | 0.7                 | +++        | ++         | -             | -              |
| IgG-rank 5  | CARDGLKVGTTTFDYW             | 3-66        | 4           | 1.4                 | +++        | ++         | -             | -              |
| IgG-rank 6  | CARGGGPYYYGSGSYNSLYYYYYYMDVW | 4-34        | 6           | 1                   | +          | +          | -             | -              |
| IgG-rank 7  | CAKDSPSGWYKGGFDYW            | 3-30        | 4           | 4.9                 | -          | -          | -             | -              |
| IgG-rank 8  | CARNGGGLGLW                  | 3-74        | 3           | 5.7                 | +          | +          | -             | -              |
| IgG-rank 9  | CARDWEYSSSFFGPW              | 3-11        | 5           | 3.7                 | +          | +          | -             | -              |
| IgG-rank 11 | CARESFKGNWFDPW               | 3-53        | 5           | 5.5                 | +++        | +++        | -             | -              |
| IgG-rank 14 | CAREIIAVADPTDGARNWYFDLW      | 3-53        | 2           | 2.1                 | +++        | ++         | -             | -              |
| IgM-rank 1  | CARGAQTTVTTLVDYYYYYMDVW      | 4-34        | 6           | 0                   | ++         | -          | -             | -              |
| IgM-rank 2  | CNTGSVAAAEPW                 | 3-15        | 5           | 2.4                 | +          | +          | -             | -              |
| IgM-rank 3  | CARDQLVHDAFDIW               | 4-31        | 3           | 0                   | ++         | +          | -             | -              |
| IgM-rank 4  | CARDTLNCGGDCYGDYW            | 3-21        | 4           | 2.1                 | +++        | ++         | -             | -              |
| IgM-rank 5  | CARDRDYGYFDYW                | 1-3         | 4           | 1.7                 | +          | -          | -             | -              |
