# Supplementary material for: Infant Antibody Repertoires during the First Two Years of Influenza Vaccination
Source: PubMed Central journal article supplement (PMC9765176; doi:10.1128/mbio.02546-22), 2022-10-31
Supplement: mbio.02546-22-s0007.pdf [file mbio.02546-22-s0007.pdf]

**Table S3: Frequency of HA- and TT-reactive Bmem.**

|         | <b>Infant 1</b> |                 | <b>Infant 2</b> |                 |
|---------|-----------------|-----------------|-----------------|-----------------|
|         | Yr 2 Pre-Vax    | Yr 2 Post-Vax   | Yr 2 Pre-Vax    | Yr 2 Post-Vax   |
| IAV     | 4/1422 (0.28%)  | 6/1505 (0.40%)  | 1/694 (0.14%)   | 3/1169 (0.26%)  |
| IBV     | 18/1422 (1.27%) | 17/1505 (1.13%) | 1/694 (0.14%)   | 5/1169 (0.43%)  |
| IAV+IBV | 1/1422 (0.07%)  | 2/1505 (0.13%)  | 0/694 (0.00%)   | 4/1169 (0.34%)  |
| Tetanus | 2/1422 (0.14%)  | 21/1505 (1.40%) | 6/694 (0.86%)   | 14/1169 (1.20%) |
