# Supplementary material for: Infant Antibody Repertoires during the First Two Years of Influenza Vaccination
Source: PubMed Central journal article supplement (PMC9765176; doi:10.1128/mbio.02546-22), 2022-10-31
Supplement: mbio.02546-22-s0008.pdf [file mbio.02546-22-s0008.pdf]

**Table S4: MFI values for CR9114 binding to each HA used in Luminex assay.**

|           | <b>HAs</b>  | <b>Luminex MFI Values</b> |
|-----------|-------------|---------------------------|
| <b>H1</b> | CA-09 X-181 | 2.73E+04                  |
|           | MI-15 X-275 | 8.64E+04                  |
|           | SI-06       | 6.31E+04                  |
| <b>H3</b> | HK-14 263b  | 5.55E+03                  |
|           | HK-68 X-31  | 1.75E+04                  |
| <b>B</b>  | Phu-13      | 1.31E+04                  |
|           | FL-17       | 9.12E+03                  |
|           | Bris-08     | 1.29E+04                  |
